# Supplementary material for: Path analysis of factors influencing oral health-related quality of life in older hospitalized patients: A cross-sectional survey
Source: Research Square preprint supplement (doi:10.21203/rs.3.rs-6684536/v1), 2025-06-06
Supplement: Supplementary file 1 [file 8aa6bd227aa94084dc586d72.docx]

**SUPPLEMENTARY FILE**

Basic information questionnaire

1. Your gender:
A - male
B - female

2. Your age (years):
A - 60–70
B - 71–80
C - 81–90
D - ≥91

3. Your household living place:
A - Village
B - City/Town
C - Urban Area

4. Your profession:
A - Farmer
B - Worker
C - Government servant
D - Teacher
E - Merchant
F - Leader of a Group

5. Your education level:
A - School Leaving Age or Below
B - Secondary Education
C - Tertiary Education
D - Higher Education or Above

6. Your living situation:
A -living alone
B - living with old companion
C - living with old compatriots
D - living with children
E - residing in a nursing Home and/or other places

7. Approximately how much monthly income do you have? (excluding fixed false teeth):
① Monthly ≤ 500 ②*Monthly*≤1,000③ Monthly ≤ 2,000 ④ *Monthly*≤3,000
⑤ Monthly ≤ 4,000 ⑥*Monthly*≤8,000⑦ 10,000⑧*Monthly*≤20,000

8. How many teeth do you have? (fixed false teeth not included):
A - ≥20
B - <20
C - ≤10

9. Do you have any movable false tooth?
A - No
B - Partially
C - All
